1 **Genetic selection for small molecule production in competitive microfluidic**  
2 **droplets**

3

4 Larry J. Millet<sup>1,2</sup>, Jessica M. Velez<sup>1</sup>, Joshua K. Michener<sup>1,\*</sup>

5 (1) Biosciences Division, Oak Ridge National Laboratory, Oak Ridge, TN, 37830; (2) The Joint  
6 Research Activity Unit of The Bredesen Center for Interdisciplinary Research and Graduate  
7 Education, University of Tennessee, Knoxville, TN, 37996.

8

9 (\*) Correspondence should be addressed to JKM ([michenerjk@ornl.gov](mailto:michenerjk@ornl.gov))

10

11 This manuscript has been authored by UT-Battelle, LLC under Contract No. DE-AC05-  
12 00OR22725 with the U.S. Department of Energy. The United States Government retains and the  
13 publisher, by accepting the article for publication, acknowledges that the United States  
14 Government retains a non-exclusive, paid-up, irrevocable, world-wide license to publish or  
15 reproduce the published form of this manuscript, or allow others to do so, for United States  
16 Government purposes. The Department of Energy will provide public access to these results of  
17 federally sponsored research in accordance with the DOE Public Access Plan  
18 (<http://energy.gov/downloads/doe-public-access-plan>).

19

20 **Abstract**

21 Biosensors can be used to screen or select for small molecule production in engineered microbes.  
22 However, mutations to the biosensor that interfere with accurate signal transduction are common,  
23 producing an excess of false positives. Strategies have been developed to avoid this limitation by  
24 physically separating the production pathway and biosensor, but these approaches have only  
25 been applied to screens, not selections. We have developed a novel biosensor-mediated selection  
26 strategy using competition between co-cultured bacteria. When applied to biosynthesis of *cis,cis*-  
27 muconate, we show that this strategy yields a selective advantage to producer strains that  
28 outweighs the costs of production. By encapsulating the competitive co-cultures into  
29 microfluidic droplets, we successfully enriched for muconate-producing strains from a large  
30 population of control non-producers. Facile selections for small molecule production will  
31 increase testing throughput for engineered microbes and allow for the rapid optimization of  
32 novel metabolic pathways.

## 33 **Introduction**

34       Engineered microbes can produce a range of valuable bioproducts, providing the basis for a  
35 renewable bioeconomy<sup>1</sup>. However, initial strain construction efforts are often inefficient, and the  
36 cost and effort required to optimize a proof-of-concept pathway can preclude further  
37 development. New strategies for constructing libraries of mutant strains have accelerated the  
38 design and build phases of the engineering cycle<sup>2-4</sup>, but these efforts are limited by the  
39 throughput of methods for identifying improved variants. Demonstrations of new library  
40 construction methods frequently use phenotypes that can be linked to microbial growth or to  
41 production of an easily-identifiable molecule, such as visibly-pigmented compounds. Using  
42 similar approaches to engineer strains that produce higher concentrations of an arbitrary small  
43 molecule is challenging.

44       One option for identifying rare variants from a mutant library is to include a biosensor, such  
45 as a metabolite-responsive transcription factor or regulatory RNA, that reports on production of  
46 the target small molecule<sup>5,6</sup>. These biosensors can be highly effective, but they also come with  
47 several limitations. Most notably, the biosensor is typically expressed from the same cell that is  
48 being engineered or evolved. As a result, mutations can occur in the sensor that disrupt the  
49 desired regulation, producing false positive signals that require significant additional screening<sup>6</sup>.  
50 An intracellular biosensor also reports on the intracellular small molecule concentration. A  
51 product that is rapidly exported may not show a differential signal as the production rate  
52 changes. Similarly, a product that is rapidly imported may produce crosstalk between  
53 neighboring cells. Finally, biosensors can be linked to selectable markers such as antibiotic  
54 resistance genes or screenable markers such as fluorescent proteins. Selections typically enable  
55 larger library sizes and require less infrastructure, but also amplify any concerns about false

56 positives during the selection.

57 Several strategies have been proposed to overcome these challenges using biosensors to  
58 screen mutant libraries. Avoiding false positives requires separating the biosensor from the strain  
59 being engineered in order to limit mutation accumulation in the biosensor. After the two  
60 functions are separated, though, measurements of productivity then require either disruptive  
61 methods to reintroduce the sensor into the producer strains<sup>7</sup> or some form of spatial structure to  
62 prevent crosstalk between members of the library. Initial efforts often used colonies spread on  
63 petri dishes, which limited the assay throughput<sup>8</sup>. More recent approaches rely on encapsulation  
64 of cells inside microfluidic droplets<sup>9-12</sup>. By physically separating individual cells into distinct  
65 droplets, interactions between cells can be eliminated. However, all of these approaches depend  
66 on quantitative screens, limiting throughput and requiring fluorescence-activated cell sorters or  
67 on-chip droplet sorters to isolate desired droplets. A biosensor-driven selection strategy would  
68 simplify the process of isolating improved variants from a mutant library while expanding the  
69 potential library size.

70 We have developed a selection strategy that uses competition between bacterial strains within  
71 microfluidic droplets to select for small molecule biosynthesis. Production of the target small  
72 molecule inhibits growth of a sensitive competitor and provides a selective advantage to the  
73 producer (Figure 1A). We show that competitor strains can be rationally engineered to be  
74 inhibited by a target small molecule, that production of the target provides an advantage to the  
75 producer, and that spatial structure is required to prevent interactions between producer cells. By  
76 combining these elements, we enriched true producer strains from a background of faster-  
77 growing non-producers. These high-through selections for small molecule production will enable  
78 rapid optimization of engineered microbes.

79

## 80 Results and Discussion

### 81 Strain design and construction

82 To establish a microbial competition mediated by small molecule production, two different  
83 strains are inoculated into microfluidic droplets. The producer strain synthesizes a target small  
84 molecule, while the competitor strain is inhibited by the synthesized target (Figure 1). We chose  
85 muconate as our target small molecule, with *Pseudomonas putida* as the producer strain and  
86 *Escherichia coli* as the competitor.

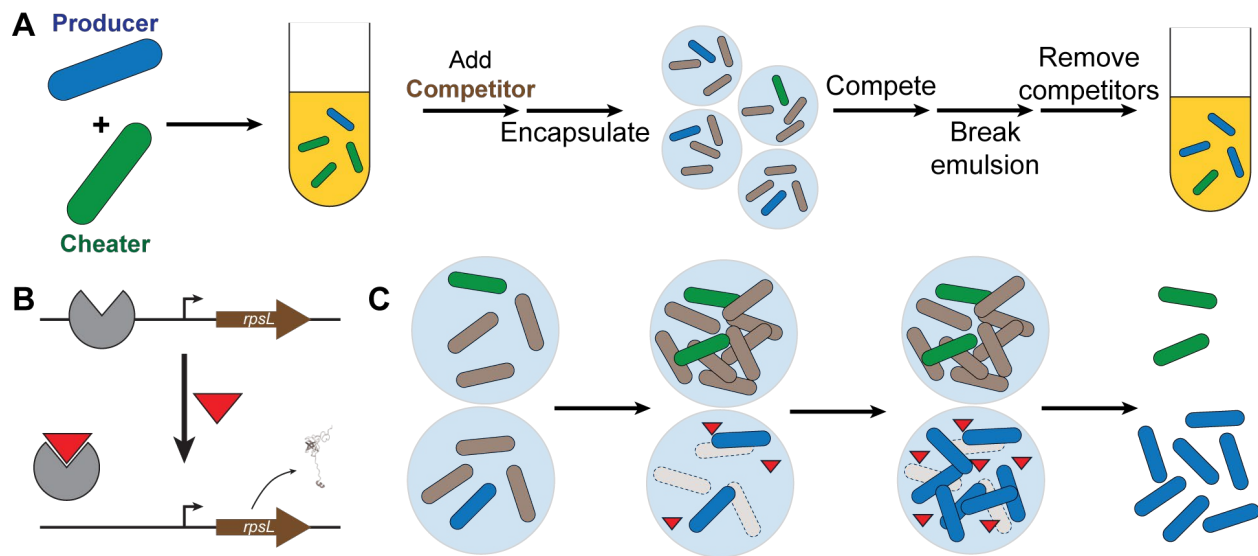

88 **Figure 1:** Competitive microfluidic droplets enable selections for small molecule production.

89 (A) A simplified population contains a mix of producer strains (blue) that synthesize the desired  
90 small molecule and cheater strains (green) that do not. This population is then combined with the  
91 competitor strain (brown) and encapsulated into microfluidic droplets where the competitor is  
92 inhibited by the target molecule. The mixed cultures are grown to saturation, the emulsion is  
93 broken, and the producer cells increase in frequency due to the fitness benefit of eliminating the  
94 competitor strain. (B) The competitor strain is inhibited by the target molecule (red triangle) due

95 to regulation of the counterselectable marker *rpsL* by the biosensor. In the presence of the target  
96 molecule, production of RpsL sensitizes the competitor strain to streptomycin. (C) In a droplet  
97 containing a cheater, the competitor strain outcompetes the cheater and limits the yield.  
98 Conversely, in a droplet containing a producer, production of the target molecule blocks  
99 competitor growth and increases the yield of the producer strain.

100

101 The selection system consists of two strains, one engineered to produce muconate and the  
102 other engineered to be inhibited by muconate. To build a suitable muconate-producing strain, we  
103 started with *P. putida* CJ102, which was been previously engineered to synthesize muconate  
104 from lignin-derived aromatic compounds<sup>13</sup>. The strain was further modified by deletion of the  
105 adhesin *lapA*, to prevent biofilm formation that otherwise interfered with independent  
106 segregation<sup>14</sup>; deletion of a component of the type 6 secretion system *tssA1*, to eliminate an  
107 alternative killing mechanism<sup>15</sup>; deletion of the glucose dehydrogenase *gcd*, to prevent  
108 accumulation of a potential cross-feeding metabolite<sup>16,17</sup>; and introduction of a streptomycin-  
109 resistance marker<sup>18</sup>. The resulting strain, JMP15, was then further modified by deletion of the  
110 phenylpropanoid-CoA synthetase *fcs*<sup>19</sup> to produce a control strain, JMP26, that is incapable of  
111 converting phenylpropanoids into muconate (Supplementary Figure 1A).

112 For the muconate-inhibited strain, we introduced a counterselection module into a  
113 streptomycin-resistant strain of *E. coli*. The counterselection module consists of a constitutive  
114 promoter driving expression of an operon containing a muconate transporter and a muconate-  
115 responsive transcription factor, combined with a regulated promoter driving expression of a  
116 counterselectable marker (Supplementary Figure 1B). We selected the *mucK* muconate  
117 transporter from *Pseudomonas putida* and the muconate-responsive transcription factor *benM*

118 from *Acinetobacter baylyi*<sup>20</sup>, and then expressed a streptomycin-sensitive allele of *rpsL* from the  
119 BenM promoter. The counterselection module was synthesized *de novo* and cloned into pET-9a.  
120 When the resulting plasmid was transformed into streptomycin-resistant *E. coli* REL606,  
121 addition of muconate inhibited growth in a dose-dependent fashion, with growth completely  
122 blocked at 10 mg/L muconate (Figure 2).

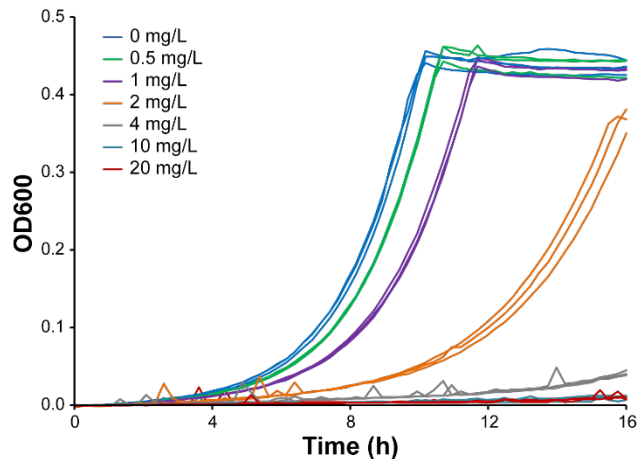

123  
124 **Figure 2:** A muconate-responsive counterselection module demonstrates dose-dependent growth  
125 inhibition. Streptomycin-resistant REL606 containing plasmid pJM242 was grown in minimal  
126 medium containing ampicillin, streptomycin, and the indicated concentration of muconate. Three  
127 biological replicates are shown.

128  
129 **Muconate production is costly but provides a competitive advantage against sensitive *E.***  
130 ***coli***

131 The engineered producer strain, JMP15, can convert coumarate to muconate in a series of  
132 reactions that conserve little usable energy. Consequently, the strain grows more slowly in  
133 minimal media containing glucose when coumarate is also added (Figure 3A). The control strain,  
134 JMP26, does not show a growth difference.

135 We then grew the producer and control strains of *P. putida* in co-culture with the muconate-

136 sensitive *E. coli*. After growth, the *P. putida* concentration was measured by plating on selective  
137 agar. When exogenous muconate was added, both *P. putida* strains showed large increases in  
138 yield (Figure 3B). After addition of coumarate, the muconate-producing strain JMP15 showed a  
139 small but significant fold increase in yield of  $1.9 \pm 0.2$  while the yield of the control strain was  
140 unchanged. When grown in competition with a muconate-sensitive *E. coli*, muconate production  
141 is costly to the cell, but the benefits of inhibiting *E. coli* growth offset the costs.

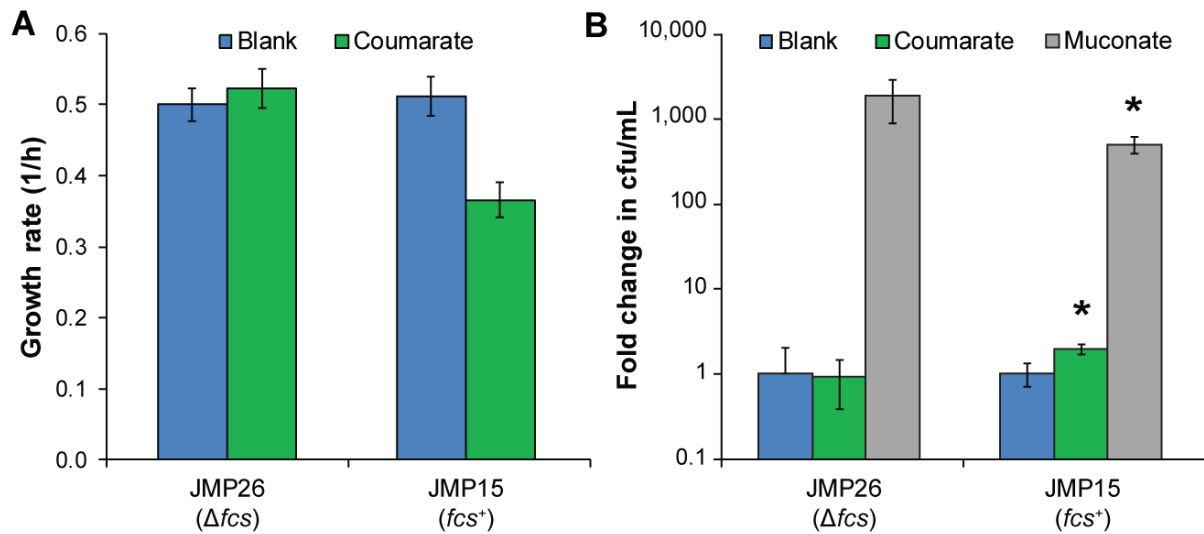

142  
143 **Figure 3:** The benefits of muconate production outweigh the costs. (A) Addition of coumarate,  
144 which can be converted into muconate, decreases the growth rate of JMP15. Deletion of the gene  
145 encoding the first enzyme in coumarate metabolism, the CoA synthetase *fcs*, eliminates this  
146 effect. (B) When grown in competition with *E. coli* that are sensitive to muconate, the addition of  
147 coumarate provides a selective advantage only for the strain able to convert it into muconate. \*:  $p$   
148  $< 0.05$ , two-tailed t-test. Error bars show one standard deviation, calculated from three biological  
149 replicates.

150

### 151 Selection of muconate producers from mixed cultures requires spatial structure

152 Muconate production provides an advantage when a pure culture of *P. putida* producers is



153 competed against *E. coli* (Figure 3B). However, when using a mixture of producer and control *P.*  
154 *putida*, the costs are borne by the individual producers but the benefits, in terms of reduced *E.*  
155 *coli* competition, are shared. Therefore, when a mixture of control and producer *P. putida* are  
156 competed against *E. coli* in test tubes, we would expect the control strains to be more fit than the  
157 producers. We tested this hypothesis by growing all three strains together, and then separating  
158 out the *P. putida* and counting the fraction of JMP15 and JMP26 colonies. As predicted, the  
159 population fraction of JMP15 was unchanged, averaging a 1.0-fold enrichment (Figure 4A).  
160 Under these conditions, muconate production still increases the fitness of the *P. putida*, but the  
161 control strains share equally in the benefits.

162 Successful selection for efficient producers, therefore, requires a method to limit the benefits  
163 of muconate production to the producers. Microfluidic droplets can provide the necessary spatial  
164 structure, by encapsulating each producer cell into a separate droplet. When a similar three-way  
165 competition was conducted in droplets, the JMP15 population ratio increased significantly,  
166 averaging a 6-fold increase from a single culture (Figure 4B and C).

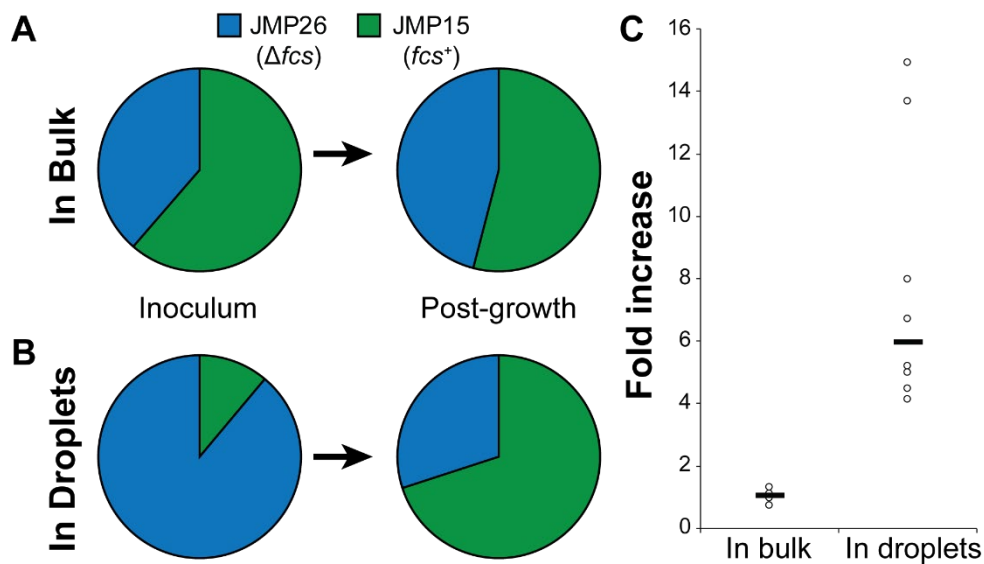

167  
168 **Figure 4:** Spatial structure enables muconate selection. (A) A mixture of control and producer

169 strains were competed against muconate-sensitive *E. coli* in test tubes. The fraction of JMP15 in  
170 the population did not change significantly. (B) When the mixed cultures were encapsulated into  
171 microfluidic droplets, a single night of growth enriched for muconate producers. One  
172 representative population ratio is shown for each condition. (C) The fold increase in JMP15  
173 relative to JMP26 was calculated for each competition culture. Each point represents a single  
174 biological replicate, and each set of competitions was repeated on at least two days. White  
175 circles: individual cultures. Black bars: Distribution median.

176

177 This selection strategy has several key advantages. By separating the counterselection  
178 module into a separate cell, mutations that prevent proper biosensor function yield false  
179 negatives rather than false positives, by preventing producers from gaining the expected benefits  
180 of muconate production. When selecting for rare phenotypes, false negatives are much more  
181 easily tolerated than false positives. Similarly, the competitor strain can be eliminated and  
182 reintroduced after every round of growth, preventing the accumulation of strains with mutated  
183 biosensors.

184 This system also streamlines the process of using biosensors in diverse bacteria. The  
185 producer and competitor strains can be entirely different species, individually chosen for specific  
186 purposes. Rather than engineering the muconate biosensor into *P. putida*, we were able to leave  
187 it in the more-tractable *E. coli* host. This muconate-sensitive competitor can then be used with  
188 any muconate producing strain that has compatible culture conditions. The producer strain,  
189 meanwhile, has no remnant of the biosensor that needs to be removed later. We also note that the  
190 biosensor is not strictly necessary, as long as a competitor strain can be identified or engineered  
191 that is inhibited by the product of interest. Finally, the validation of a new biosensor is

192 simplified. Frequently, biosensors are validated through exogenous addition of small molecules  
193 and then used to sense compounds produced intracellularly. Here, the competitor strain is  
194 intended to respond to exogenous products, so testing and application are performed under  
195 equivalent conditions.

196 The selective pressures that result from this approach are complex. An increase in either  
197 growth rate or muconate production would be expected to provide a selective advantage. In  
198 general, we expect this complex selective pressure to be a benefit of this approach, since the  
199 parallel selection for growth rate prevents the accumulation of mutations with strong fitness costs  
200 and will yield robust strains. The selective pressure can also be tuned in multiple ways, including  
201 modifying the sensitivity of the biosensor to its target, changing the initial population ratio of  
202 producers and competitors, or engineering the competitor to grow more or less quickly.

203 While the initial selective advantage for a single round of growth in droplets was modest,  
204  $5.8 \pm 1.5$ -fold, this represents a clear selection against nonproductive mutations. Mutant strains  
205 with increased productivity will likely gain an additional selective advantage and produce a  
206 larger fold enrichment.

207 New methods for strain and library construction have expanded the opportunities for large-  
208 scale biological design. However, testing the resulting strains currently limits throughput. To  
209 address this bottleneck, we have developed a flexible biosensor-driven selection strategy using  
210 bacterial competition in microfluidic droplets. Using this approach, libraries generated through a  
211 variety of methods can be rapidly tested to identify rare variants that improve productivity. By  
212 increasing testing throughput, we can accelerate the development of new production strains and  
213 shorten the time to market.

214

## 215 **Materials and Methods**

### 216 **Media and chemicals**

217 All chemicals were from Sigma-Aldrich unless otherwise noted. Strains were routinely  
218 propagated in LB or M9 minimal medium containing 2 g/L glucose. Antibiotics were 50 µg/mL  
219 kanamycin, 100 µg/mL ampicillin, and 50 µg/mL streptomycin. Stock solutions of muconate and  
220 coumarate at 100 mg/mL were made fresh in DMSO and diluted to the appropriate  
221 concentrations as needed. Microfluidic droplets used HFE-7500 (3M, St. Paul, MN) as the bulk  
222 phase and 008-FluoroSurfactant (RAN Biotechnologies, Beverly, MA) as the surfactant.

223

### 224 **Genetic manipulation**

225 Strains JMP15 and JMP26 contain multiple mutations relative to the parental strain CJ102.  
226 For gene deletions, the appropriate deletion construct, containing approximately 500 bp of  
227 homology on both sides of the gene to be deleted, were synthesized *de novo* (IDT, Skokie, IL)  
228 and assembled into pK18mobsacB<sup>21</sup> using the HiFi Assembly Master Mix (NEB, Ipswich, MA).  
229 The resulting plasmids were transformed into *P. putida* by electroporation, followed by selection  
230 on LB + kanamycin and counterselection on YT + 25% sucrose<sup>22</sup>. Gene deletions were verified  
231 by colony PCR and Sanger sequencing (Eurofins Genomics, Louisville, KY). To introduce the  
232 streptomycin resistance marker, plasmids pUX-BF13 and pBK-miniTn7-gfp3 were  
233 cotransformed into the recipient *P. putida* strain by electroporation, followed by selection on LB  
234 + kanamycin.

235

### 236 **Growth curves**

237 Strains for growth curve experiments were grown to saturation overnight at 30 °C in M9 + 2

238 g/L glucose + ampicillin. The cultures were then diluted 100-fold into fresh medium and grown  
239 in 48-well plates in an Epoch 2 plate reader (BioTek, Winooski, VT) at 30 °C. Growth rates were  
240 calculated using CurveFitter software<sup>23</sup>.

241

## 242 **Bulk competition assays**

243 Strains JMP15, JMP26, and REL606+pJM242 were grown to saturation overnight at 30 °C  
244 in M9 + 2 g/L glucose + ampicillin. The cultures were washed once and then diluted into 5 mL  
245 of fresh M9 + 4 g/L glucose + ampicillin + streptomycin containing the relevant substrate as  
246 indicated. Inoculation densities were OD 0.01 for JMP15 or JMP26, and 0.3 for  
247 REL606+pJM242. For mixed *P. putida* cultures, the inoculation densities for JMP15 and JMP26  
248 were 0.005, and the inoculum cultures were plated on LB + kanamycin as described below to  
249 determine the initial population ratio. Cultures were grown overnight at 30 °C, then diluted and  
250 plated on LB + kanamycin. For pure culture experiments, colonies were counted and adjusted for  
251 the dilution factor. For mixed culture experiments, individual colonies were isolated and  
252 genotyped by colony PCR of the *fcs* locus.

253

## 254 **Droplet competition assays**

255 Droplet competition assays were performed in a similar fashion as bulk assays. The *P.*  
256 *putida* inoculation densities were decreased to 0.002 for pure cultures or 0.001 for each mixed  
257 culture, to produce an average of one *P. putida* per 10 droplets. The *E. coli* inoculation density  
258 was maintained at 0.15, yielding an average of approximately 6 *E. coli* per droplet. Initial  
259 population ratios were determined by plating dilutions on LB + kanamycin agar.

260 Droplet encapsulation was performed on a Dolomite µEncapsulator system using a 50 µm

261 fluorophilic droplet chip, according to the manufacturer's directions. The *P. putida* and *E. coli*  
262 cell suspensions were placed in separate channels of the reservoir immediately before  
263 encapsulation. Flow rates of the driving fluids for *P. putida* and *E. coli* were set to 7  $\mu\text{L}/\text{min}$  and  
264 the surfactant-in-oil solution was held constant at 22  $\mu\text{L}/\text{min}$ . Stability of the droplet generation  
265 process was visually monitored to validate each run to completion. A typical run generated  
266 approximately three million droplets with an average diameter of 60  $\mu\text{m}$ . After one culture  
267 reservoir was exhausted, the collection vial was removed, immediately capped, inspected for  
268 quality (no visually distinguishable large droplets observed) and emulsion quantity ( $\sim 500 \mu\text{L}$   
269 total, 200  $\mu\text{L}$  emulsion layer), and incubated at 30  $^{\circ}\text{C}$  overnight.

270 After overnight growth, the emulsion was broken through the addition of 200  $\mu\text{L}$  of  
271 perfluorooctanol. The mixture was gently mixed by flicking the tube 5 times, then allowed to  
272 settle for 5 min. The top aqueous layer ( $\sim 120 \mu\text{L}$ ) was removed into a new sterile microfuge  
273 tube and serial dilutions ( $10^{-1}$  to  $10^{-3}$ ) plated onto LB + kanamycin agar. Following overnight  
274 growth at 30  $^{\circ}\text{C}$ , densities were determined through colony counting, and population ratios by  
275 colony PCR of the *fcs* locus as described above.

276

## 277 Tables

| Strain | Genotype                                                                                                                     | Source    |
|--------|------------------------------------------------------------------------------------------------------------------------------|-----------|
| REL606 | F <sup>-</sup> <i>tsx467</i> (Am) <i>araA230 lon rpsL227</i> (Sm <sup>R</sup> ) <i>hsdR</i>                                  | 24        |
| CJ102  | <i>P. putida</i> KT2440 $\Delta$ <i>catRBC::Ptac:catA</i> $\Delta$ <i>pcaHG::Ptac:aroY</i>                                   | 25        |
| JMP9   | CJ102 $\Delta$ <i>lapA</i>                                                                                                   | This work |
| JMP10  | CJ102 $\Delta$ <i>lapA</i> $\Delta$ <i>tssA1</i>                                                                             | This work |
| JMP14  | CJ102 $\Delta$ <i>lapA</i> $\Delta$ <i>tssA1</i> $\Delta$ <i>gcd</i>                                                         | This work |
| JMP15  | CJ102 $\Delta$ <i>lapA</i> $\Delta$ <i>tssA1</i> $\Delta$ <i>gcd</i> Km <sup>R</sup> Sm <sup>R</sup> GFP                     | This work |
| JMP25  | CJ102 $\Delta$ <i>lapA</i> $\Delta$ <i>tssA1</i> $\Delta$ <i>gcd</i> $\Delta$ <i>fcs</i>                                     | This work |
| JMP26  | CJ102 $\Delta$ <i>lapA</i> $\Delta$ <i>tssA1</i> $\Delta$ <i>gcd</i> $\Delta$ <i>fcs</i> Km <sup>R</sup> Sm <sup>R</sup> GFP | This work |

278 Table 1: Strains used in this work.

279

| Plasmid          | Genotype                                                                                           | Source      |
|------------------|----------------------------------------------------------------------------------------------------|-------------|
| pUX-BF13         | <i>mob</i> <sup>+</sup> Tn7 transposase Ap <sup>R</sup>                                            | 18          |
| pBK-miniTn7-gfp3 | Km <sup>R</sup> Cm <sup>R</sup> Sm <sup>R</sup> Ap <sup>R</sup> <i>mob</i> <sup>+</sup> <i>gfp</i> | 18          |
| pJV1             | Km <sup>R</sup> <i>sacB</i> <i>mob</i> <sup>+</sup> $\Delta$ <i>tssA1</i>                          | This work   |
| pJE364           | Km <sup>R</sup> <i>sacB</i> <i>mob</i> <sup>+</sup> $\Delta$ <i>lapA</i>                           | Unpublished |
| pJE365           | Km <sup>R</sup> <i>sacB</i> <i>mob</i> <sup>+</sup> $\Delta$ <i>gcd</i>                            | Unpublished |
| pJM242           | pBR322 Ap <sup>R</sup> apFab61- <i>mucK-benM</i> pbenM- <i>rpsL</i> <sup>*</sup>                   | This work   |
| pJM384           | Km <sup>R</sup> <i>sacB</i> <i>mob</i> <sup>+</sup> $\Delta$ <i>fcs</i>                            | This work   |

280 Table 2: Plasmids used in this work

## 281 Acknowledgements

282 Gregg Beckham and Chris Johnson graciously provided strain CJ102. Strains pUX-BF13  
283 and pBK-mini-Tn7-gfp3 were provided by Ole Nybroe. Plasmids pJE364 and pJE365 were  
284 provided by Joshua Elmore and Adam Guss. Oak Ridge National Laboratory is managed by UT-  
285 Battelle, LLC, for the DOE under Contract No. DE-AC05-00OR22725.

286

## 287 Funding Information

288 This work was supported by the Laboratory Directed Research and Development program at  
289 the Oak Ridge National Laboratory.

290

## 291 References

- 292 1. Department of Energy, U. S. *2016 Billion-Ton Report: Advancing domestic resources for*  
293 *a thriving bioeconomy, Volume 1: Economic availability of feedstocks.* (2016).
- 294 2. Garst, A. D. *et al.* Genome-wide mapping of mutations at single-nucleotide resolution for  
295 protein, metabolic and genome engineering. *Nat. Biotechnol.* **35**, 48–55 (2016).
- 296 3. Halperin, S. O. *et al.* CRISPR-guided DNA polymerases enable diversification of all

- 297 nucleotides in a tunable window. *Nature* **560**, 248–252 (2018).
- 298 4. Wang, H. H. *et al.* Programming cells by multiplex genome engineering and accelerated  
299 evolution. *Nature* **460**, 894–898 (2009).
- 300 5. Tang, S.-Y. & Cirino, P. C. Design and Application of a Mevalonate-Responsive  
301 Regulatory Protein. *Angew. Chemie Int. Ed.* **50**, 1084–1086 (2011).
- 302 6. Michener, J. K. & Smolke, C. D. High-throughput enzyme evolution in *Saccharomyces*  
303 *cerevisiae* using a synthetic RNA switch. *Metab. Eng.* **14**, 306–316 (2012).
- 304 7. Esvelt, K. M., Carlson, J. C. & Liu, D. R. A system for the continuous directed evolution  
305 of biomolecules. *Nature* **472**, 499–503 (2011).
- 306 8. Pflieger, B. F., Pitera, D. J., Newman, J. D., Martin, V. J. J. & Keasling, J. D. Microbial  
307 sensors for small molecules: Development of a mevalonate biosensor. *Metab. Eng.* **9**, 30–  
308 38 (2007).
- 309 9. Agresti, J. J. *et al.* Ultrahigh-throughput screening in drop-based microfluidics for directed  
310 evolution. *Proc. Natl. Acad. Sci. U. S. A.* **107**, 4004–9 (2010).
- 311 10. Wang, B. L. *et al.* Microfluidic high-throughput culturing of single cells for selection  
312 based on extracellular metabolite production or consumption. *Nat. Biotechnol.* **32**, 473–  
313 478 (2014).
- 314 11. Siedler, S. *et al.* Development of a bacterial biosensor for rapid screening of yeast *p* -  
315 coumaric acid production. *ACS Synth. Biol.* acssynbio.7b00009 (2017).  
316 doi:10.1021/acssynbio.7b00009
- 317 12. Abatemarco, J. *et al.* RNA-aptamers-in-droplets (RAPID) high-throughput screening for  
318 secretory phenotypes. *Nat. Commun.* **8**, 332 (2017).
- 319 13. Vardon, D. R. *et al.* cis,cis-Muconic acid: separation and catalysis to bio-adipic acid for



- 320 nylon-6,6 polymerization. *Green Chem.* **18**, 3397–3413 (2016).
- 321 14. Espinosa-Urgel, M., Salido, A. & Ramos, J. L. Genetic analysis of functions involved in  
322 adhesion of *Pseudomonas putida* to seeds. *J. Bacteriol.* **182**, 2363–9 (2000).
- 323 15. Bernal, P., Allsopp, L. P., Filloux, A. & Llamas, M. A. The *Pseudomonas putida* T6SS is  
324 a plant warden against phytopathogens. *ISME J.* **11**, 972–987 (2017).
- 325 16. del Castillo, T. *et al.* Convergent peripheral pathways catalyze initial glucose catabolism  
326 in *Pseudomonas putida*: genomic and flux analysis. *J. Bacteriol.* **189**, 5142–52 (2007).
- 327 17. Eisenberg, R. C. & Dobrogosz, W. J. Gluconate metabolism in *Escherichia coli*. *J.*  
328 *Bacteriol.* **93**, 941–9 (1967).
- 329 18. Koch, B., Jensen, L. E. & Nybroe, O. A panel of Tn7-based vectors for insertion of the  
330 *gfp* marker gene or for delivery of cloned DNA into Gram-negative bacteria at a neutral  
331 chromosomal site. *J. Microbiol. Methods* **45**, 187–195 (2001).
- 332 19. Nelson, K. E. *et al.* Complete genome sequence and comparative analysis of the  
333 metabolically versatile *Pseudomonas putida* KT2440. *Environ. Microbiol.* **4**, 799–808  
334 (2002).
- 335 20. Rogers, J. K. & Church, G. M. Genetically encoded sensors enable real-time observation  
336 of metabolite production. *Proc. Natl. Acad. Sci. U. S. A.* **113**, 2388–93 (2016).
- 337 21. Schäfer, A. *et al.* Small mobilizable multi-purpose cloning vectors derived from the  
338 *Escherichia coli* plasmids pK18 and pK19: selection of defined deletions in the  
339 chromosome of *Corynebacterium glutamicum*. *Gene* **145**, 69–73 (1994).
- 340 22. Johnson, C. W. & Beckham, G. T. Aromatic catabolic pathway selection for optimal  
341 production of pyruvate and lactate from lignin. *Metab. Eng.* **28**, 240–247 (2015).
- 342 23. Delaney, N. F. *et al.* Development of an optimized medium, strain and high-throughput

- 343 culturing methods for *Methylobacterium extorquens*. *PLoS One* **8**, e62957 (2013).
- 344 24. Sniegowski, P. D., Gerrish, P. J. & Lenski, R. E. Evolution of high mutation rates in  
345 experimental populations of *E. coli*. *Nature* **387**, 703–705 (1997).
- 346 25. Johnson, C. W. *et al.* Enhancing muconic acid production from glucose and lignin-derived  
347 aromatic compounds via increased protocatechuate decarboxylase activity. *Metab. Eng.*  
348 *Commun.* **3**, 111–119 (2016).
- 349
